# Supplementary material for: A variational reformulation of molecular properties in electronic-structure theory
Source: PubMed Central journal article supplement — Sci Adv. 2024 Apr 24;10(17):eadn3454. doi: 10.1126/sciadv.adn3454 (PMC11042728; doi:10.1126/sciadv.adn3454), 2024-04-24
Supplement: sciadv.adn3454_sm.pdf [file sciadv.adn3454_sm.pdf]

Supplementary Materials for  
**A variational reformulation of molecular properties in  
electronic-structure theory**

Poul Jørgensen *et al.*

Corresponding author: Poul Jørgensen, pou@chem.au.dk; Kurt V. Mikkelsen, kmi@chem.ku.dk;  
Trygve Helgaker, helgaker@uio.no

*Sci. Adv.* **10**, eadn3454 (2024)  
DOI: 10.1126/sciadv.adn3454

**The PDF file includes:**

Table S1

Dataset

Table S1

Coordinates for H<sub>2</sub>O in Ångström

|   | X              | Y               | Z              |
|---|----------------|-----------------|----------------|
| O | 0.000000000000 | 0.000000000000  | 0.000000000000 |
| H | 0.000000000000 | 0.756950000140  | 0.585882000133 |
| H | 0.000000000000 | -0.756950000140 | 0.585882000133 |

**Other Supplementary Materials for this manuscript include the following:**

Link to the molecular dataset used in the paper

[https://lcpq.github.io/QUESTDB\\_website/dataset/](https://lcpq.github.io/QUESTDB_website/dataset/)
